# Supplementary material for: Synthesis of New Chitosan from an Endemic Chilean Crayfish Exoskeleton (Parastacus Pugnax): Physicochemical and Biological Properties
Source: MDPI journal article supplement (doi:10.3390/polym13142304), 2021-07-14
Supplement: s1 [file s1]

**Figure S1. MIC determination to Chitosan-CGNA and Commercial Chitosan**

The graphics shows the absorbance (OD<sub>600</sub>) for each bacteria incubated whit different concentrations of chitosan at 35°C during 20 h. The MIC is the concentration of chitosan where the OD<sub>600</sub> go down near to zero.

**P. aeruginosa**

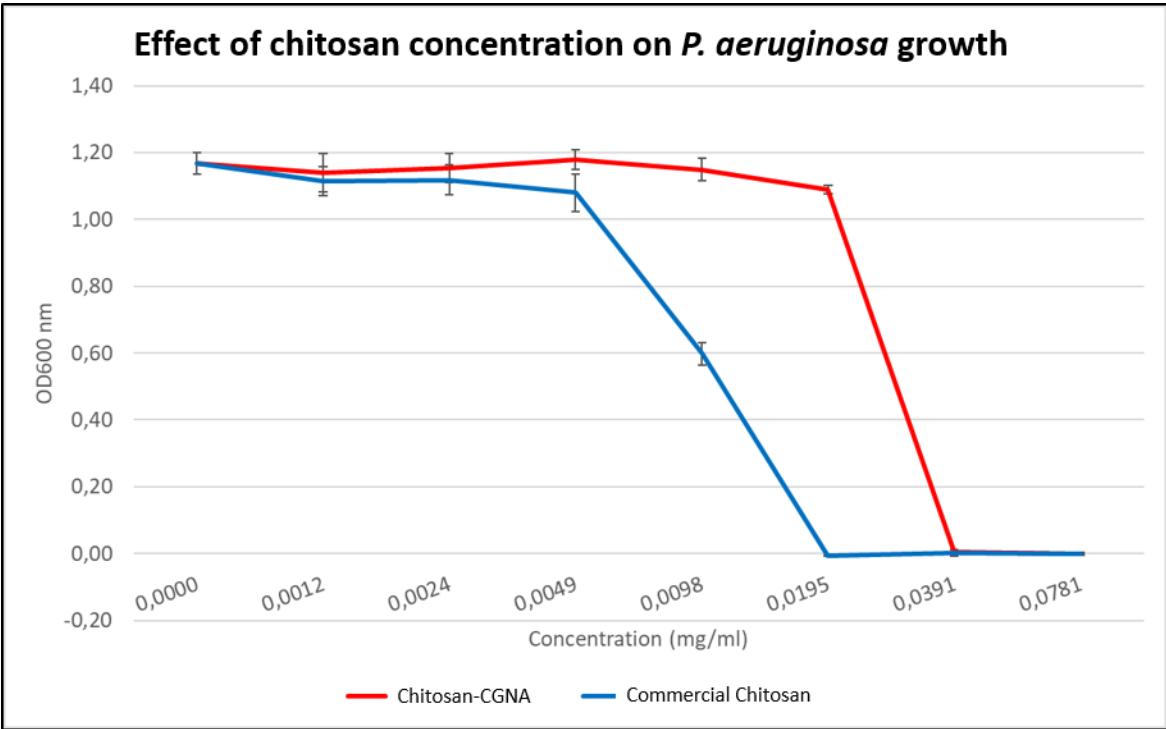

**S. typhimurium**

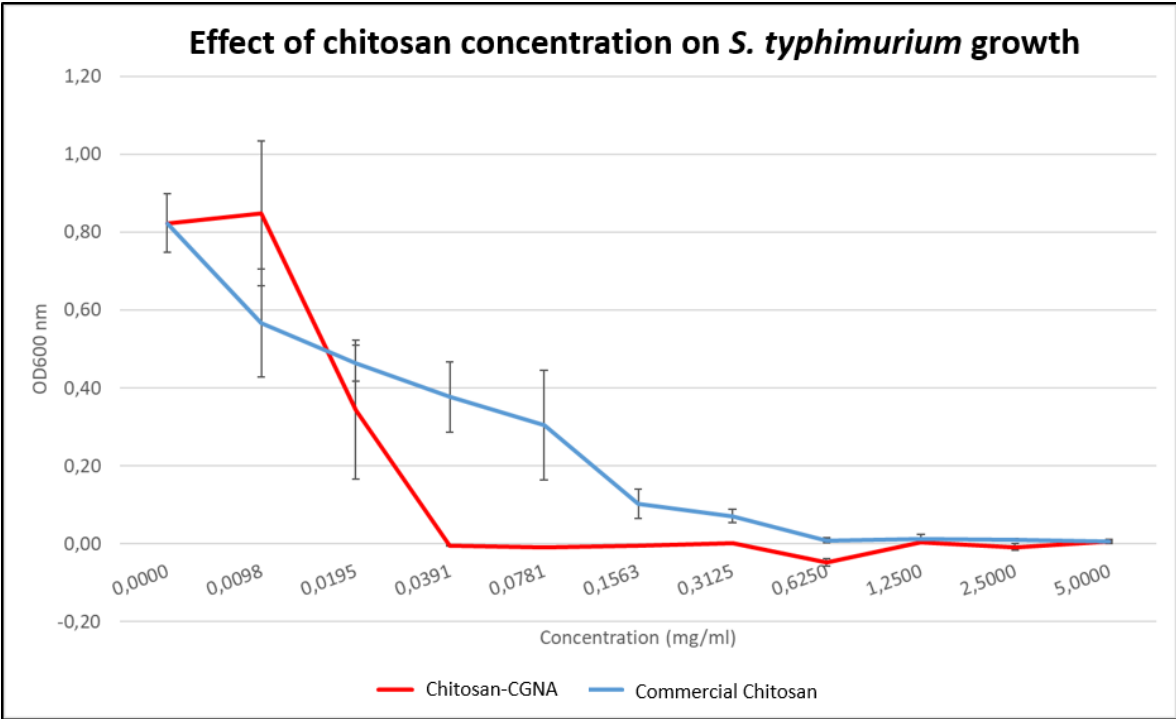

## **E. coli**

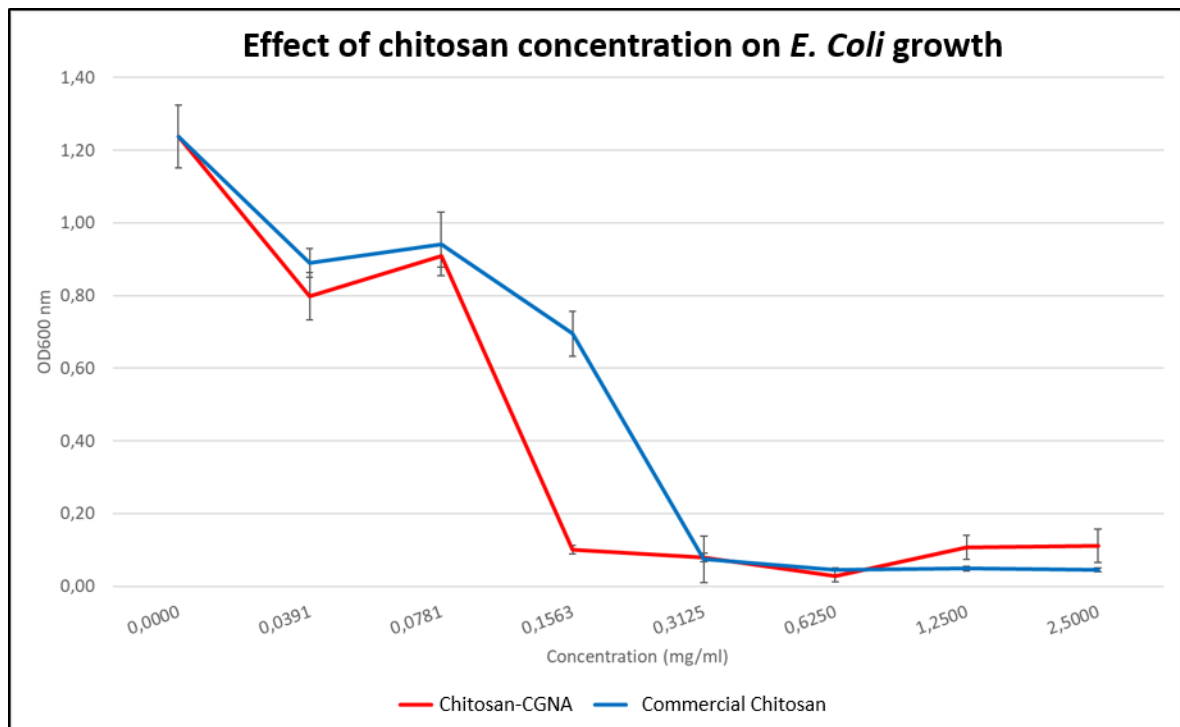

## **E. faecalis**

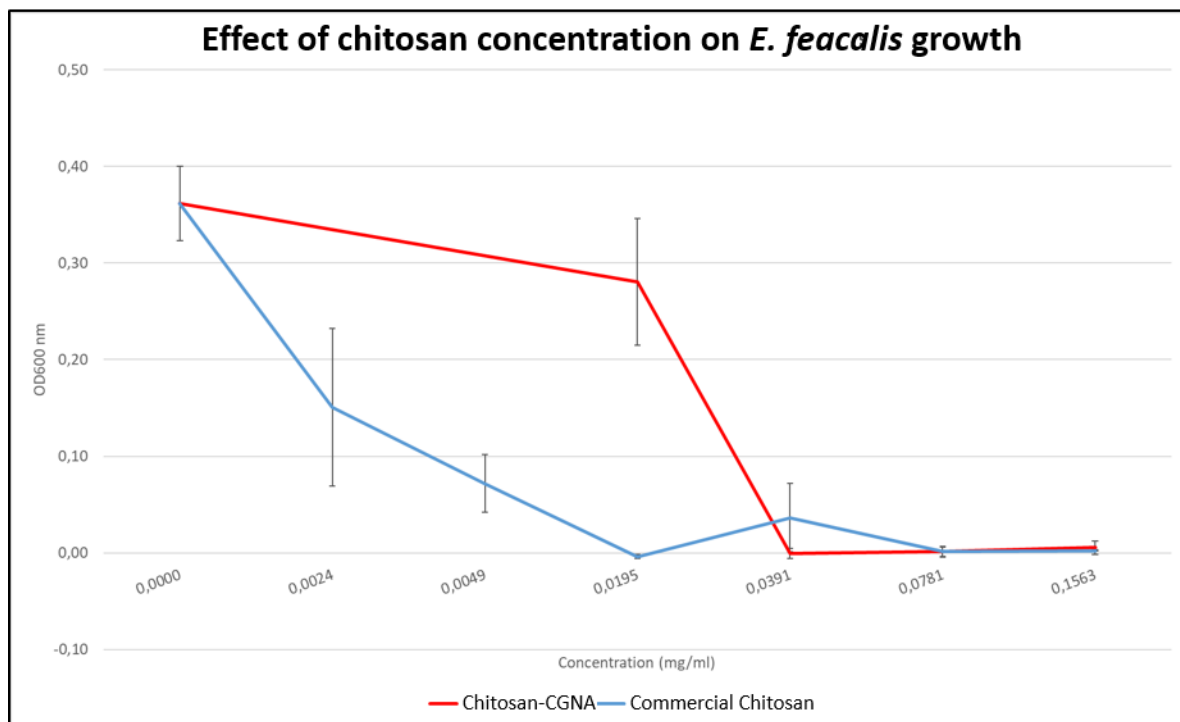

**L. monocytogenes**

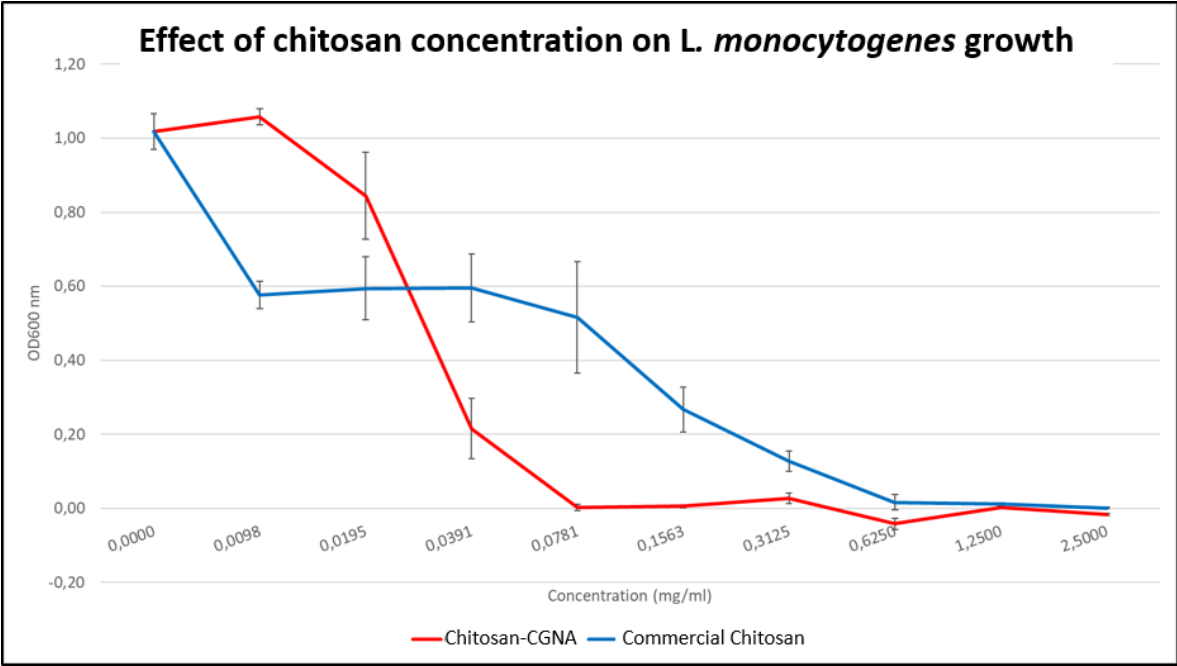

**S. aureus**

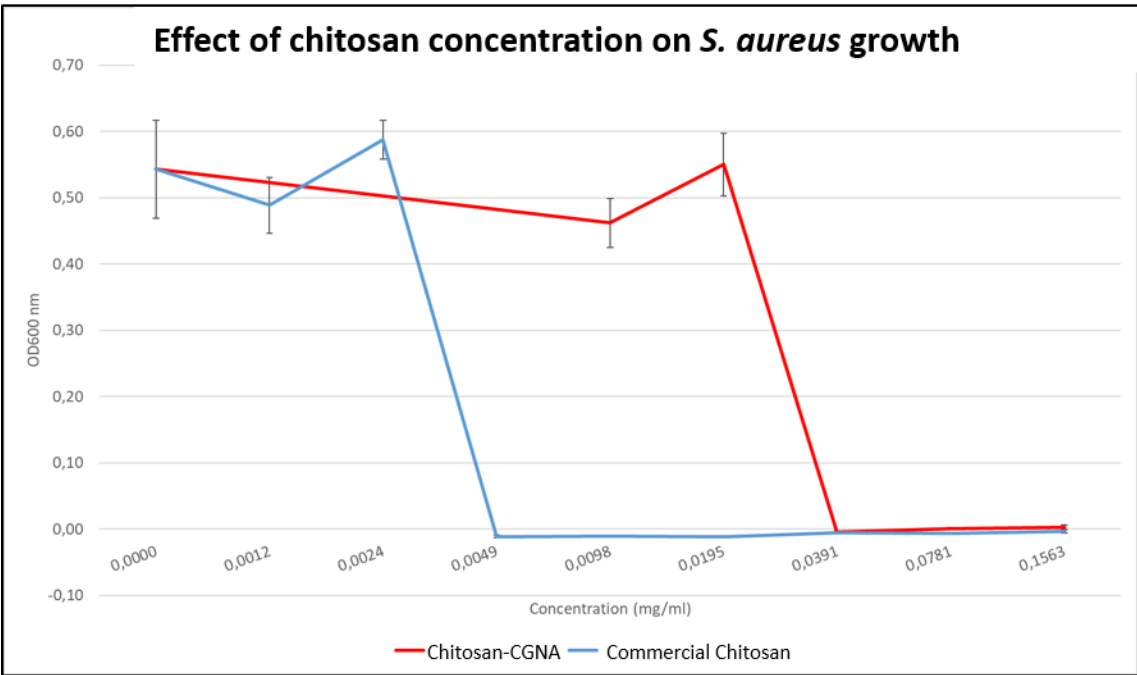

**Figure S2. MBC Determination to Chitosan-CGNA and Chitosan-Commercial**  
Plates of bacteria previously incubated with different concentrations of chitosan at 35°C.

The MBC is the lower concentration of chitosan that did prevent any visible bacterial growth on plate after 24 h incubation at 35°C±2.

**P. aeruginosa**

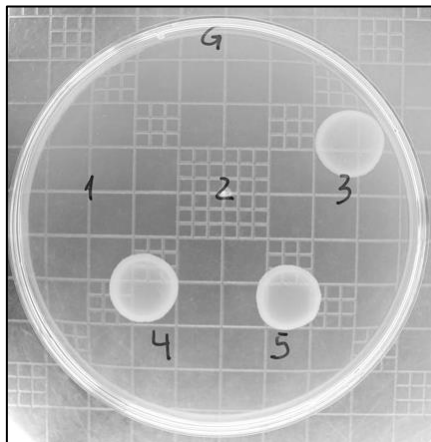

**Chitosan-CGNA (mg/ml):** 1) 0.08; 2) 0.04; 3) 0.02; 4) 0.01; 5) 0.005

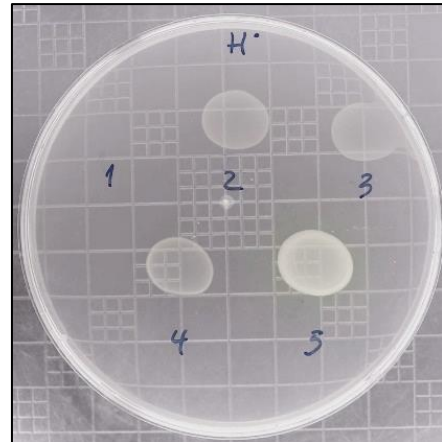

**Chitosan-Commercial (mg/ml):** 1) 0.02; 2) 0.01; 3) 0.005; 4) 0.002; 5) 0.001

**S. typhimurium**

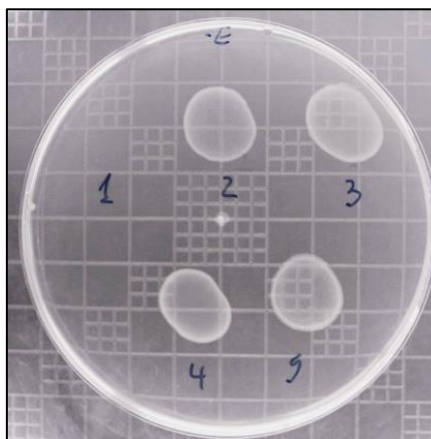

**Chitosan-CGNA (mg/ml):** 1) 0.04; 2) 0.02; 3) 0.01; 4) 0.005; 5) 0.002

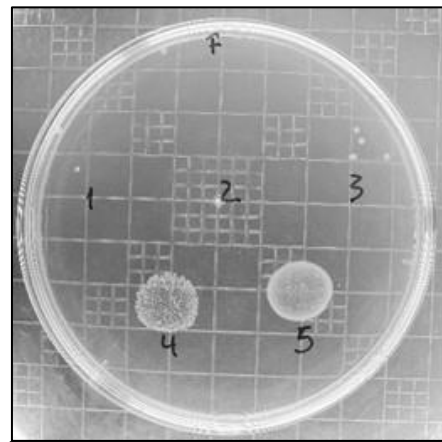

**Chitosan-Commercial (mg/ml):** 1) 1.25; 2) 0.63; 3) 0.31; 4) 0.16; 5) 0.08

**E. coli**

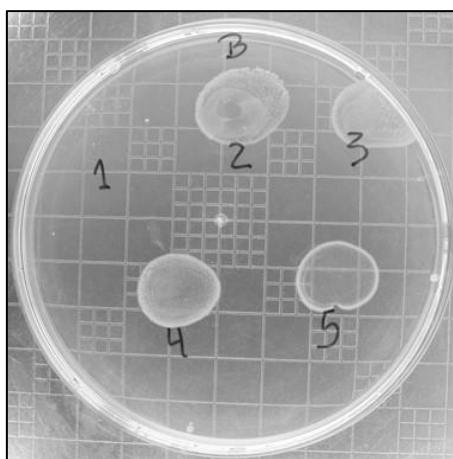

**Chitosan-CGNA (mg/ml):** 1) 0.31; 2) 0.16; 3) 0.08; 4) 0.04; 5) 0.02

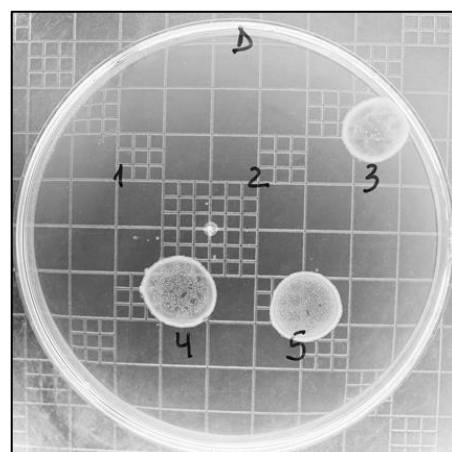

**Chitosan-Commercial (mg/ml):** 1) 1.25; 2) 0.63; 3) 0.31; 4) 0.16; 5) 0.08

**E. faecalis**

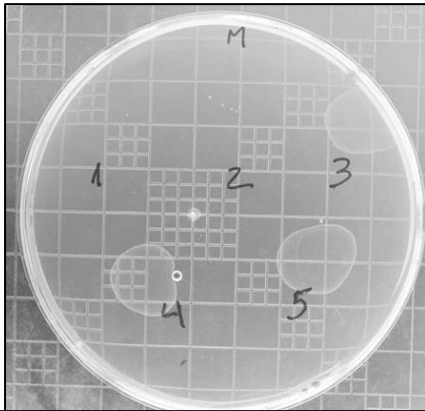

**Chitosan-CGNA** (mg/ml): 1) 0.04; 2) 0.02; 3) 0.01; 4) 0.005; 5) 0.002

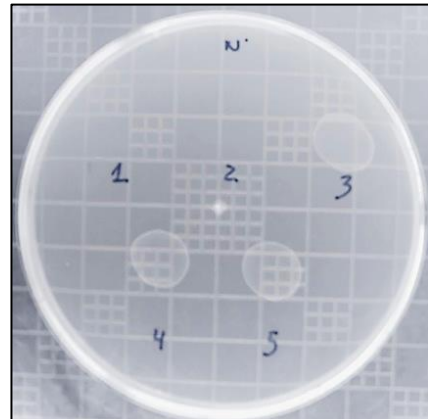

**Chitosan-Commercial** (mg/ml): 1) 0.31; 2) 0.15; 3) 0.08; 4) 0.04; 5) 0.02

**L. monocytogenes**

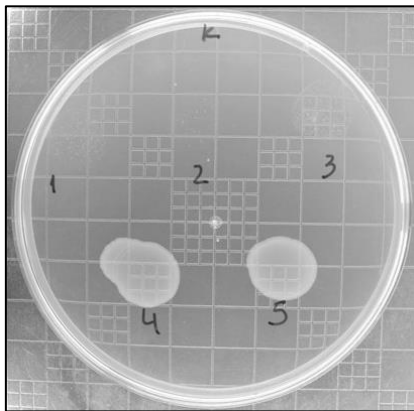

**Chitosan-CGNA** (mg/ml): 1) 0.31; 2) 0.16; 3) 0.08; 4) 0.04; 5) 0.02

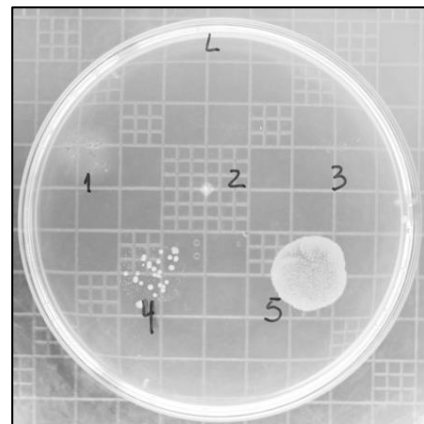

**Chitosan-Commercial** (mg/ml): 1) 5; 2) 2.5; 3) 1.25; 4) 0.63; 5) 0.31

**S. aureus**

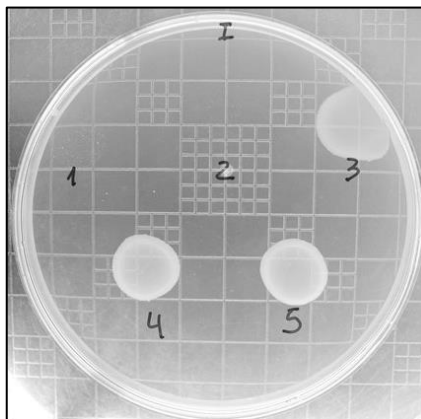

**Chitosan-CGNA** (mg/ml): 1) 0.08; 2) 0.04; 3) 0.02; 4) 0.01; 5) 0.005

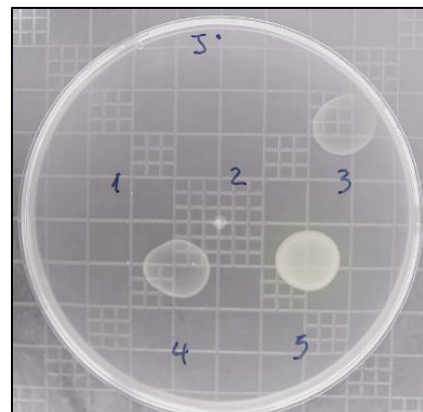

**Chitosan-Commercial** (mg/ml): 1) 0.04; 2) 0.02; 3) 0.01; 4) 0.005; 5) 0.002
